# Supplementary material for: Genome, host genome integration, and gene expression in Diadegma fenestrale ichnovirus from the perspective of coevolutionary hosts
Source: Frontiers journal article supplement (doi:10.3389/fmicb.2023.1035669), 2023-02-17
Supplement: Image_5.pdf [file Image_5.pdf]

## Supplementary Material

# Genome, Host Genome Integration, and Gene Expression in *Diadegma fenestrale* Ichnovirus from the Perspective of Coevolutionary Hosts

Juil Kim<sup>1,2\*</sup>, Md-Mafizur Rahman<sup>3</sup>, A-Young Kim<sup>4</sup>, Ramasamy Srinivasan<sup>5</sup>, Min Kwon<sup>6</sup>, Yonggyun Kim

\* **Correspondence:** Corresponding Author: forweek@kangwon.ac.kr

## 1 Supplementary Figures and Tables

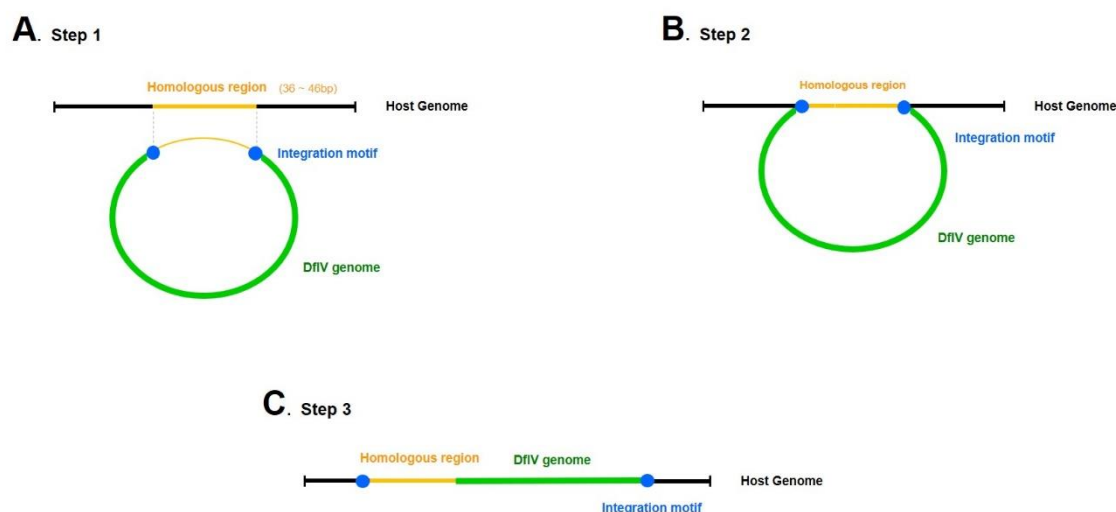

**Supplementary Figure 5.** A proposed schematic diagram of the integration mechanism between *Diadegma fenestrale* ichnovirus (DfIV) and the diamondback moth (*Plutella xylostella*) genome. **A).** The homologous sequences ranged in length from 36–46 bp between circular viral genomic (DfIV) segments and host genome segments, and integration motifs flanked homologous regions. **B).** Host and viral homologous regions were integrated and surrounded by the flanking sites of the integration motif. **C).** The homologous region and integrated motifs were combined into a partial linearized host genome during the homologous recombination process (Legeai et al., 2020). Detailed information (re-sequencing results, integration motif sequences and their positions in the host genome, homologous sequences and their positions) is provided in supplementary Table S4 and Figure 2.
